# Supplementary material
Source: Springer Nature journal article supplement (https://www.springermedizin.de/resource/supplementary/12884_2012_564_MOESM2_ESM.pdf/9458064)
Supplement: MOESM2 [file 9458064]

# Pregnancy registry

# Pregnancy outcome data-sheet

|                             |                             |
|-----------------------------|-----------------------------|
| Mother's Registry ID: _____ | Mother's initials: _____    |
| Mother's Clinic ID: _____   | Mother's age (years): _____ |
| Baby's Registry ID: _____   | Baby's Clinic ID: _____     |

|                        |                                  |                             |
|------------------------|----------------------------------|-----------------------------|
| Assessor's name: _____ | Assessor's position/title: _____ | Assessor's signature: _____ |
|------------------------|----------------------------------|-----------------------------|

## Mother's medical history, treatments and test results since last ANC visit

How have you been and what treatments did you take even if unrelated to your pregnancy? Consider anything a health worker, traditional healer, birth attendant, shop-keeper, relative or friend has given/sold to you.

|                                                                                               |     |    |    |
|-----------------------------------------------------------------------------------------------|-----|----|----|
| Have you had malaria?                                                                         | Yes | No | NK |
| Have you had fever other than malaria?                                                        | Yes | No | NK |
| Have you taken any treatments to prevent malaria?                                             | Yes | No | NK |
| Have you had any condition apart from malaria or fever?                                       | Yes | No | NK |
| Have you had any vaccines?                                                                    | Yes | No | NK |
| Have you taken any traditional or herbal medicines?                                           | Yes | No | NK |
| Have you taken any routine treatments (e.g. folic acid, iron supplements, deworming tablets)? | Yes | No | NK |
| Have you taken any other treatment, apart from those mentioned above?                         | Yes | No | NK |
| Have you had any tests, including obstetric ultrasound, at a clinic?                          | Yes | No | NK |

## Medical history, treatments, and tests

| Condition (complete all "treatments" in section below) | Start /diagnosis date  | Duration                        | How was condition diagnosed? (tick all that apply) |                   |            |      |                       |
|--------------------------------------------------------|------------------------|---------------------------------|----------------------------------------------------|-------------------|------------|------|-----------------------|
|                                                        | dd mmm yy/how long ago | ongoing, # of days/months/years | Clinical                                           | Smear/ Microscopy | Rapid test | Swab | Other (specify) or NK |
|                                                        |                        |                                 |                                                    |                   |            |      |                       |
|                                                        |                        |                                 |                                                    |                   |            |      |                       |
|                                                        |                        |                                 |                                                    |                   |            |      |                       |
|                                                        |                        |                                 |                                                    |                   |            |      |                       |

| Name of treatment | Indication | Start date             | Duration                              | Route* | Source of information** |
|-------------------|------------|------------------------|---------------------------------------|--------|-------------------------|
|                   |            | dd mmm yy/how long ago | once, ongoing, # of days/months/years |        |                         |
|                   |            |                        |                                       |        |                         |
|                   |            |                        |                                       |        |                         |
|                   |            |                        |                                       |        |                         |
|                   |            |                        |                                       |        |                         |
|                   |            |                        |                                       |        |                         |

\* oral, rectal, injection, nasal, topical, ocular, per vagina \*\*patient report (pt report), other record (specify), diary, other (specify)

|                     |             |                     |             |
|---------------------|-------------|---------------------|-------------|
| Name of test: _____ |             | Name of test: _____ |             |
| Date/how long ago   | Result/unit | Date/how long ago   | Result/unit |
| _____ dd mmm yy     |             | _____ dd mmm yy     |             |

## Outcome of Current Pregnancy (use separate sheets for each baby if a multiple birth)

|                                                                               |                                  |                                                                                                                  |
|-------------------------------------------------------------------------------|----------------------------------|------------------------------------------------------------------------------------------------------------------|
| Date of outcome: _____ dd mmm yy                                              | Time of outcome _____ hh : mm    | Place of outcome: _____                                                                                          |
| Date of assessment: _____ dd mmm yy                                           | Time of assessment _____ hh : mm | Place of assessment: _____                                                                                       |
| Number of gestations: singleton or multiple, number: _____                    |                                  | Gestational age at birth outcome (weeks): _____                                                                  |
| Method for estimation of gestation age: LMP      Ultrasound      Other: _____ |                                  |                                                                                                                  |
| Type of delivery:                                                             | Normal vaginal                   | Forceps      Vacuum      Elective C-section      Emergency C-Section      Breech      Elective/ Medical abortion |

|                                                                                     |                           |                                                |                     |                                |                        |
|-------------------------------------------------------------------------------------|---------------------------|------------------------------------------------|---------------------|--------------------------------|------------------------|
| Mother's Registry ID: _____                                                         | Baby's Registry ID: _____ |                                                |                     |                                |                        |
| Who delivered the baby?                                                             | Doctor                    | TBA                                            | Nurse/midwife       | Relative                       | Other (specify): _____ |
| What was the type of labour?                                                        | Spontaneous               | Induced                                        | Augmented           | Elective C-section (no labour) | NK                     |
| What was the birth outcome?                                                         | Infant alive              | Infant dead, date of death: _____<br>dd mmm yy |                     |                                | NK                     |
| What was the sex of the baby?                                                       | Male                      | Female                                         | Ambiguous genitalia | NK                             |                        |
| If infant is dead: was the baby reported to be moving in the day prior to labour?   | Yes                       | No                                             | NK                  | NA                             |                        |
| If infant is dead: was a foetal heart sound detected at assessment before delivery? | Yes                       | No                                             | NK                  | NA                             |                        |
| Were there complications at delivery (mother/child)?                                | No                        | Yes (describe): _____                          |                     |                                |                        |

### Assessment of the newborn/stillborn

|                                                           |                                                               |                              |
|-----------------------------------------------------------|---------------------------------------------------------------|------------------------------|
| Weight: _____ g                                           | Supine length: _____ cm                                       | Head circumference: _____ cm |
| Heart rate: _____ beats/min or NA (if infant is dead)     | Respiratory rate: _____ breaths/min or NA (if infant is dead) |                              |
| Has infant passed urine? Yes No NK NA (if infant is dead) | Has infant passed a stool? Yes No NK NA (if infant is dead)   |                              |

| Examinations/examples of what to look for                                                                | Normal? |    | Description (remember to take photos of abnormalities) |
|----------------------------------------------------------------------------------------------------------|---------|----|--------------------------------------------------------|
|                                                                                                          | Yes     | No |                                                        |
| Head and neck (including skull, fontanelles, eyes, ears, nose, jaw)                                      | Yes     | No |                                                        |
| Mouth, lips (?thin/cleft)                                                                                | Yes     | No |                                                        |
| Chest (?shape, respiratory movements)                                                                    | Yes     | No |                                                        |
| Abdomen and anus (?masses/closure defect)                                                                | Yes     | No |                                                        |
| Arms and legs (?length, shape, parts missing)                                                            | Yes     | No |                                                        |
| Fingers and toes (including nails ?number, dangling, fused, shape/parts missing, abnormally large/small) | Yes     | No |                                                        |
| Spine ( ?lumps or "cysts" or bulging in the back including the neck; thorax; lumbar area)                | Yes     | No |                                                        |
| Hips and genitalia (including urethra, testes, penile shaft, vagina, labia)                              | Yes     | No |                                                        |
| Skin (?pale, blue, birth marks or any large "very red areas")                                            | Yes     | No |                                                        |
| Other abnormality or unusual finding. If so, describe and take photos                                    |         |    |                                                        |
| Additional notes/comments                                                                                |         |    |                                                        |

|                                                                  |                     |                                           |    |
|------------------------------------------------------------------|---------------------|-------------------------------------------|----|
| If doctor did not assess infant, did a doctor confirm defect(s)? | No (why not?) _____ | Yes (Doctor's name/signature/date): _____ | NA |
| Was the baby referred?                                           | No (why not?) _____ | Yes (who to/where to): _____              | NA |

### General notes on completing this form

Use 'X' or '✓' or underline/circle a field. Ask questions about health/treatments/tests as written on the data sheet. If a woman indicates any illness, treatment or test since last ANC visit give details in the medical history/treatment/test tables on page 1.

The standard date format is dd mmm yy e.g. 12 FEB 09. If part of the date is unknown put a line. e.g. -- / ---- / 09. If a date is estimated use ± in front e.g. ± 12 FEB 09. If only an approximate knowledge of timescale is known use x days ago, x weeks ago etc. e.g. 6 months ago. Leave the duration section blank until you know it. If a medical condition or treatment is ongoing at the time of delivery please write "ongoing" in the duration box.

One line per item unless stopped and then started again. If intermittent condition/treatment, indicate this and write overall start/stop dates as above. Write in full apart from NK (not known), ND (not done), NA (not applicable).

If you find information from another source (e.g. another clinic record form, diary etc.) complete the form as fully as possible from this data. If updating the form with subsequent information, or correcting entries, neatly cross out the original and write the new. Initial/date any changes you make.

For multiple births use a separate form for each baby without duplicating mother's medical history/treatment/tests
